# ***In vitro* transcribed guide RNAs trigger an innate immune response via the RIG-I pathway**

**Short title: *In vitro* transcribed guide RNAs trigger an innate immune response**

Beeke Wienert<sup>1,2</sup>, Jiyung Shin<sup>1,2</sup>, Elena Zelin<sup>1,2</sup>, Kathleen Pestal<sup>2</sup> and Jacob E. Corn<sup>1,2,#</sup>

<sup>1</sup> Innovative Genomics Initiative, University of California, Berkeley, Berkeley, USA

<sup>2</sup> Department of Molecular and Cell Biology, University of California, Berkeley, Berkeley, USA

# Corresponding author: [jcorn@berkeley.edu](mailto:jcorn@berkeley.edu)

## 1 **Abstract**

2 CRISPR-Cas9 genome editing is revolutionizing fundamental research and has great potential for  
3 the treatment of many diseases. While editing of immortalized cell lines has become relatively  
4 easy, editing of therapeutically relevant primary cells and tissues can remain challenging. One  
5 recent advancement is the delivery of a Cas9 protein and an *in vitro* transcribed (IVT) guide RNA  
6 (gRNA) as a precomplexed ribonucleoprotein (RNP). This approach allows editing of primary  
7 cells such as T cells and hematopoietic stem cells, but the consequences beyond genome editing  
8 of introducing foreign Cas9 RNPs into mammalian cells are not fully understood. Here we show  
9 that the IVT gRNAs commonly used by many laboratories for RNP editing trigger a potent innate  
10 immune response that can be several thousand times stronger than benchmark immune stimulating  
11 ligands. IVT gRNAs are recognized in the cytosol through the RIG-I pathway but not the MDA5  
12 pathway, thereby triggering a type I interferon response. Removal of the 5'-triphosphate from  
13 gRNAs ameliorates inflammatory signaling and prevents the loss of viability associated with  
14 genome editing in hematopoietic stem cells. The potential for Cas9 RNP editing to induce a potent  
15 antiviral response indicates that care must be taken when designing therapeutic strategies to edit  
16 primary cells.

17

18 **Abbreviations:**

19 Cas - CRISPR-associated

20 CIP - calf intestinal alkaline phosphatase

21 CRISPR - clustered, regularly interspaced, short palindromic repeat

22 dCas9 – nuclease-dead Cas9

23 HEK293 - Human embryonic kidney cells 293

24 HEK293T - Human embryonic kidney cells 293 SV40 large T antigen

25 HeLa – Henrietta Lacks cells

26 HSPCs – CD34<sup>+</sup> human hematopoietic stem and progenitor cells

27 IFNAR1 - Interferon Alpha And Beta Receptor Subunit 1

28 IFN $\beta$ /IFNB1 - Interferon beta

29 ISG15 - Interferon-stimulated gene 15

30 IVT – *in vitro* transcribed

31 KO - knockout

32 MAVS - mitochondrial activator of virus signaling

33 MDA5/IFIH1 - melanoma differentiation-associated gene 5/ Interferon Induced with Helicase C

34 Domain 1

35 PAMP - pathogen-associated molecular pattern

36 RIG-I/DDX58 - retinoic acid-inducible gene I/ DExD-H-box helicase 58

37 gRNA –guide RNA

38 SPRI - solid phase reversible immobilization

39 WT – wild type

40

## 41 **Introduction**

42 CRISPR (clustered, regularly interspaced, short palindromic repeat)-Cas (CRISPR-associated)  
43 genome editing has rapidly become a widely used tool in molecular biology laboratories. Its ease  
44 of use and high flexibility allows researchers to modify and edit genomes in cell lines (1), stem  
45 cells (2), animals and plants (3,4), and even human embryos (5). At least two components must  
46 be successfully delivered into cells during genome editing: the Cas protein, such as Cas9, and a  
47 guide RNA (gRNA) to direct the Cas protein to its target site. For *in vitro* cultured cells this can  
48 be done by transfecting plasmids encoding gRNA and Cas9 protein. However, transfection of  
49 plasmid DNA into sensitive cell types such as primary and stem cells is challenging and inefficient.  
50 The introduction of plasmids can also lead to undesired integration of DNA at the cut site (6),  
51 increased off-target activity through prolonged expression of the CRISPR-Cas9 components (7),  
52 and a delay in editing while the cell expresses gRNA and Cas protein (8).

53

54 The delivery of gRNA and Cas9 protein as a pre-complexed ribonucleoprotein (RNP) sidesteps  
55 issues related to plasmid expression and has proved to be a successful strategy to edit human  
56 primary cells, including T cells (9,10), hematopoietic stem cells (11–14), and neurons (15). This  
57 makes RNP editing a particularly attractive approach for therapeutic applications, but relatively  
58 little is known about the non-editing consequences of introducing a foreign gRNA and Cas9  
59 protein. Human cells have evolved multiple defense mechanisms to guard against foreign  
60 components, and genome editing reagents have the potential to activate these systems. For  
61 example, recent data suggests that humans may have a pre-existing adaptive immune response to  
62 the Cas9 protein (16). But cellular responses to the gRNAs used to program Cas9 editing have so  
63 far not been well explored.

64 Cells respond to infection by RNA-viruses with an innate immune response that protects the host  
65 cell from invading foreign genetic material (17). Foreign RNAs are recognized by pathogen-  
66 associated molecular pattern (PAMP) binding receptors in the cytosol that include retinoic acid-  
67 inducible gene I (RIG-I) and melanoma differentiation-associated gene 5 (MDA5) (18). This  
68 triggers a cascade of events mediated by the mitochondrial activator of virus signaling (MAVS)  
69 protein resulting in the transcriptional activation of type I interferons and interferon-stimulated  
70 genes (ISGs) (19–21).

71  
72 PAMPs usually contain exposed 5'-triphosphate ends (18), which may also be present in gRNAs  
73 made via T7 *in vitro* transcription (IVT) (22,23). We asked whether IVT gRNAs cause an innate  
74 immune response, and here show that RNP genome editing induces upregulation of interferon beta  
75 (IFN $\beta$ ) and interferon-stimulated gene 15 (ISG15) in a variety of human cell types. This activity  
76 depends upon RIG-I and MAVS, but is independent of MDA5. The extent of the immune response  
77 depends upon the protospacer sequence, but removal of the 5'-triphosphate from gRNAs avoids  
78 stimulation of innate immune signaling. The potential for Cas9 RNP editing to induce an antiviral  
79 response indicates that care must be taken when designing therapeutic strategies to edit primary  
80 cells.

81

## 82 **Results**

83 To investigate if mammalian cells react to IVT gRNA/Cas9 with an innate immune response, we  
84 first performed genome editing in human embryonic kidney 293 (HEK293) cells using Cas9 RNPs.  
85 To separate innate immune response from genome editing, we performed these experiments with  
86 a non-targeting gRNA that recognizes a sequence within BFP and has no known targets within the

87 human genome (24). Constant amounts of recombinant Cas9 protein were complexed with  
88 different amounts of non-targeting IVT gRNA and RNPs were transfected into HEK293 cells using  
89 CRISPRMAX lipofection reagent (25). We harvested cells 30h after transfection and measured  
90 transcript levels of *IFNB1* and *ISG15* by qRT-PCR (**Figure 1A**). Introduction of gRNAs caused a  
91 dramatic increase in both *IFNB1* and *ISG15* levels, and the presence of Cas9 protein did not have  
92 an effect on the outcome. Cas9 on its own did not induce *IFNB1* or *ISG15* expression. To our  
93 surprise, as little as 1 pmol of gRNA was sufficient to trigger a 30-50-fold increase in the  
94 transcription of innate immune genes. We further found that the commonly-administered 100 pmol  
95 of a gRNA can induce *IFNB1* by 4,000 fold, which is equal to or even stronger than induction by  
96 canonical IFN $\beta$  inducers such as viral mRNA from Sendai Virus (26) or a Hepatitis C virus (HCV)  
97 PAMP (20,27) (**Figure 1B**).

98  
99 RNPs can be delivered into cells via different transfection methods and while lipofection is cost-  
100 effective and easy to use, many researchers prefer electroporation for harder-to-transfect cells. We  
101 wondered if the transfection method would affect the IFN $\beta$  response and compared gRNA  
102 transfection via lipofection (Lipofectamine 2000 and RNAiMAX) to nucleofection (Lonza)  
103 (**Figure 1C**). Lipofection led to a strong increase in *IFNB1* and *ISG15* transcript levels after as  
104 little as 6h post transfection, and the response was sustained for up to 48 hours. Nucleofection also  
105 caused an increase in innate immune signaling at early time points, but the response was much  
106 milder than in lipofected samples and was greatly diminished by 48 hours.

107  
108 Next, we asked if the innate immune response to gRNAs is a common phenomenon across different  
109 cell types and compared IFN $\beta$  activation in seven commonly used human cell lines of various

110 lineages: HEK293T, HEK293, HeLa, Jurkat, HCT116, HepG2 and K562 (**Figure 2A**). While the  
111 magnitude of induction varied between cell lines, all tested cell lines responded to IVT gRNA  
112 transfection with activation of *IFNB1* expression. The sole exception was K562 cells, which have  
113 a homozygous deletion of the *IFNA* and *IFNB1* genes (28). We also measured transcript levels of  
114 two major cytosolic pathogen recognition receptors, RIG-I (*DDX58*) and MDA5 (*IFIH1*), and  
115 noticed that all cell lines except K562 upregulated these transcripts in response to introduction of  
116 gRNAs. We also confirmed these results on the protein level in HEK293 cells (**Figure 2B**).

117  
118 The RIG-I and MDA5 receptors complement each other by recognizing different structures in  
119 foreign cytosolic RNAs, but the exact nature of their ligands is not yet fully understood (29,30).  
120 To investigate if IVT gRNAs are recognized via RIG-I or MDA5, we generated clonal knockout  
121 (KO) cell lines for RIG-I, MDA5, and their downstream interaction partner MAVS in HEK293  
122 cells using CRISPR-Cas9. As the expression of both RIG-I and MDA5 are themselves stimulated  
123 by IFN $\beta$ , we confirmed successful KO after transfection with gRNAs by genomic PCR, Sanger  
124 sequencing, and Western Blot (**Supplementary Figure 1A-C**). MAVS KO cells were confirmed  
125 by Western Blot (**Supplementary Figure 1D**). Strikingly, activation of *IFNB1* expression after  
126 introduction of gRNAs was absent in RIG-I and MAVS KO cells, while MDA5 KO cells did not  
127 show a significant decrease in *IFNB1* transcript levels (**Figure 2C**). This indicates that IVT gRNAs  
128 are exclusively recognized through RIG-I to trigger a type I interferon response.

129  
130 As the structural requirements of RIG-I ligands are still not completely understood, we wondered  
131 if different 20 nucleotide protospacers in gRNAs vary in their potency to trigger an innate immune  
132 response via RIG-I. We designed 10 additional non-targeting gRNAs that we *in vitro* transcribed

133 and transfected into HEK293 cells. Surprisingly, we found that the cells responded to different  
134 protospacers with a wide range of differential *IFNBI* expression. Several gRNAs produced very  
135 little innate immune response, and one gRNA (gRNA11) yielded no *IFNBI* activation at all  
136 (**Figure 3A**). We speculated that the differential response may be correlated with the purity of the  
137 RNA product after IVT or the stability of the secondary structure of the RNA (31). However, we  
138 found that there was no obvious correlation between the immune response to certain gRNAs and  
139 their purity, predicted protospacer secondary structure, full secondary structure including the  
140 constant region, or predicted disruption of the constant region by mis-pairing with the protospacer  
141 (**Supplementary Figure 2**). These results indicate that RIG-I recognition patterns of IVT gRNAs  
142 are complex and difficult to predict *a priori* based on predicted properties of the variable  
143 protospacer.

144  
145 One well-established requirement of RIG-I ligands is the presence of a 5'-triphosphate group (32).  
146 We asked if preparations that remove the 5' triphosphate might avoid or reduce the innate immune  
147 response to IVT gRNAs. We first used a synthetic gRNA that lacks a 5'-triphosphate and verified  
148 that this gRNA does not induce *IFNBI* expression when transfected into HEK293 cells (**Figure**  
149 **3B**). Synthetic guide RNAs are becoming more commonplace, but are still an order of magnitude  
150 more expensive than IVT of gRNAs. This limits their application for high-throughput interrogation  
151 of gene function in primary cells. We therefore asked if treatment of IVT gRNA with calf intestinal  
152 alkaline phosphatase (CIP) to remove the 5'-triphosphate would reduce *IFNBI* induction. We  
153 found that CIP treatment significantly reduced the *IFNBI* response (**Figure 3B**). Using different  
154 CIP treatment regimes, we further found that removal of the 5'-triphosphate must to be absolutely  
155 complete and should be carried out rigorously to avoid IFN stimulation (**Supplementary Figure**



156 **A-B**). We also compared purification of IVT gRNAs by solid phase reversible immobilization  
157 (SPRI) beads to column purification and established that SPRI bead clean-up is not sufficient to  
158 completely avoid an immune response even when more CIP is used (**Figure 3B and**  
159 **Supplementary Figure 3C**). Taken together, these results indicate that 5'-triphosphate is a  
160 necessary requirement for gRNA-induced *IFNBI* activation through RIG-I, but that additional  
161 structural properties of the gRNAs also influence the magnitude of the immune response.

162

163 When a cell initiates an antiviral immune response, it also undergoes cellular stress that can affect  
164 cell viability (33,34). Hence, we asked if there is a correlation between the IFN $\beta$  response and cell  
165 viability after transfection with synthetic, IVT or CIP-treated IVT gRNA. Not surprisingly, the  
166 viability of the very robust HEK293 cell line was not affected by the antiviral immune response  
167 (**Supplementary Figure 3D**). We then turned to primary CD34<sup>+</sup> human hematopoietic stem and  
168 progenitor cells (HSPCs), which are a much more sensitive cell type. We first nucleofected HSPCs  
169 with RNPs targeting the *HBB* gene (11) and compared synthetic and IVT gRNA interferon  
170 stimulation and cell viability post transfection. Double-strand breaks have been reported to cause  
171 innate immune stimulation and can themselves cause decreases in cell fitness (35,36). Therefore,  
172 we performed controls using nuclease-dead Cas9 (dCas9) to form RNPs. We saw a significant  
173 decrease in cell viability of HSPCs in both IVT gRNA RNP samples which was associated with  
174 an increase in IFN stimulated genes *ISG15* and *RIG-I* (**Figure 3C-D**). We did not see a substantial  
175 difference in viability or ISG expression between Cas9 and dCas9 RNPs suggesting that nuclease  
176 activity did not affect the immune response. Next, we asked if CIP treatment of gRNAs could  
177 reverse the decrease in viability in HSPCs. We nucleofected HSPCs with dCas9 RNPs targeting a

178 non-coding intron of *JAK2* and compared synthetic, IVT and CIP-treated IVT gRNAs. Strikingly,  
179 CIP treatment could completely restore the viability in HSPCs (**Figure 3E**).

180

## 181 **Discussion**

182 We have found that IVT gRNAs used with Cas9 RNPs for many genome editing experiments can  
183 trigger a strong innate immune response in many mammalian cell types (**Figure 4**). Lipofection  
184 results in a stronger and longer lasting response than nucleofection, possibly because lipofection  
185 delivers gRNAs to the cytosol while nucleofection delivers mainly to the nucleus. Using isogenic  
186 knockout clones, we found the gRNA-induced response is mediated via the anti-viral RIG-I  
187 pathway and results in expression of genes that initiate an antiviral immune response. While  
188 introduction of IFN-stimulating gRNAs does not affect viability in HEK293 cells, we found that  
189 viability of primary HSPCs is negatively affected by the antiviral immune response.

190

191 These results have several implications. We suggest that the gene signature associated with type I  
192 interferon stimulation should be considered when studying the transcriptome of recently edited  
193 bulk populations of cells. Furthermore, all mammalian cells can both produce type I interferons  
194 and also respond to them through the ubiquitously expressed receptor Interferon Alpha And Beta  
195 Receptor Subunit 1 (IFNAR1) (37). Even cells that have not been successfully transfected with  
196 RNPs could sense the  $INF\beta$  produced by neighboring cells and activate downstream antiviral  
197 defense mechanisms. This could be an important consideration during *in vivo* genome editing  
198 applications as RNP delivery into one set of cells could provoke a wide-spread innate immune  
199 response in the surrounding tissues.

200

201 We found that synthetic gRNAs completely circumvent the RIG-I mediated response, offering a  
202 valuable path to avoid innate immune signaling during therapeutic editing. However, synthetic  
203 gRNAs can become expensive when performing experiments that require testing or using many  
204 gRNAs. We found that a cost-effective CIP treatment to remove the 5'-triphosphate before  
205 transfection reduces the immune response and increases post-transfection viability in HSPCs.  
206 Complete removal of the 5'-triphosphate is essential to restore viability in HSPCs to the same level  
207 as observed with synthetic gRNAs. Thus, consideration of a potential innate immune stimulation  
208 prior to choice of genome editing reagents, study design, and implementation of controls is critical  
209 when performing genome editing using RNPs in mammalian cells.

210 Double-strand breaks have on their own been reported to induce an innate immune response (35).  
211 However, we performed controls comparing WT Cas9 to a nuclease-dead Cas9 thereby showing  
212 that the gRNA-mediated innate immune response and associated cell death in HSPCs is not caused  
213 by double-strand breaks.

214

215 While we were preparing this manuscript for submission, the Kim group reported similar results  
216 in HeLa cells and primary human CD4<sup>+</sup> T cells (38). They confirmed that the type I interferon  
217 response is dependent on the presence of a 5'-triphosphate group and that CIP treatment can  
218 increase viability by avoiding the antiviral response. These results are very much in alignment with  
219 our findings and extend the potential problem of innate immune signaling to additional cell types.

220

221 Our study adds extra depth by further outlining the mechanisms by which gRNAs are sensed. We  
222 show that gRNA sensing depends upon RIG-I and MAVS, but MDA5 knockout cells are fully  
223 capable of inducing IFN $\beta$  after IVT gRNA transfection. Hence, gRNA sensing is independent of

224 the MDA5 PAMP receptor. Furthermore, we show that in addition to a 5'-triphosphate, the  
225 protospacer sequence is also critical to determine the intensity of the IFN $\beta$  response. Not only do  
226 different gRNAs induce different innate immune responses, some gRNAs induce no response at  
227 all. It has been proposed that 5'-basepaired RNA structures are required to activate antiviral  
228 signaling via RIG-I, but we found no correlation between signaling and a variety of predicted RNA  
229 properties, including secondary structure (31). Our results therefore suggest that the mechanism of  
230 gRNA sensing by the RIG-I pathway is relatively complex, in that it requires 5' triphosphates but  
231 that this moiety is not sufficient to induce the response. Future work to delineate the full set of  
232 molecular features responsible for gRNA activation of innate immunity might yield accurate  
233 predictors of innate immune signaling in general.

234

## 235 **Materials and methods**

### 236 *In vitro* transcription of gRNAs

237 gRNA was synthesized by assembly PCR and *in vitro* transcription as previously described (11).  
238 Briefly, a T7 RNA polymerase substrate template was assembled by PCR from a variable 58-59  
239 nt primer containing T7 promoter, variable gRNA guide sequence, and the first 15 nt of the non-  
240 variable region of the gRNA (T7FwdVar primers, 10 nM, Supplementary Table 1; Supplementary  
241 Table 2 for gRNA sequences), and an 83 nt primer containing the reverse complement of the  
242 invariant region of the gRNA (T7RevLong, 10 nM), along with amplification primers  
243 (T7FwdAmp, T7RevAmp, 200 nM each). The two long primers anneal in the first cycle of PCR  
244 and are then amplified in subsequent cycles. Phusion high-fidelity DNA polymerase was used for  
245 assembly (New England Biolabs). Assembled template was used without purification as a substrate  
246 for *in vitro* transcription by T7 RNA polymerase using the HiScribe T7 High Yield RNA Synthesis

247 kit (New England Biolabs) following the manufacturer's instructions. Resulting transcription  
248 reactions were treated with DNase I (New England Biolabs), and RNA was purified by treatment  
249 with a 5X volume of homemade solid phase reversible immobilization (SPRI) beads (comparable  
250 to Beckman-Coulter AMPure beads) and elution in RNase-free water.

251

#### 252 CIP treatment of IVT gRNAs

253 When gRNAs were treated with Alkaline Calf intestinal phosphatase (CIP) (New England  
254 Biolabs), 20U of CIP (2  $\mu$ l) were added per 20  $\mu$ l IVT reaction and samples were incubated at 37C  
255 for 3h before proceeding to purification and DNaseI treatment. CIP-treated samples and  
256 corresponding no CIP IVT gRNA controls were purified using a Qiagen RNeasy Mini Kit  
257 (Qiagen). The detailed protocol and additional notes are available online  
258 ([dx.doi.org/10.17504/protocols.io.nghdbt6](https://doi.org/10.17504/protocols.io.nghdbt6)).

259

#### 260 In vitro transcription of HCV PAMP and Sendai Virus DI RNA

261 HCV PAMP IVT template (20) was generated by annealing HCV fwd and rev (5  $\mu$ M each) oligos  
262 (Supplementary Table 1). 2  $\mu$ l of the annealed product was used as DNA template in the  
263 subsequent IVT reaction using HiScribe T7 High Yield RNA Synthesis kit (New England  
264 Biolabs).

265 The plasmid containing the SeV DI RNA(26) was a gift from Prof. Peter Palese, Icahn School of  
266 Medicine at Mount Sinai, New York. Plasmid was digested with HindII/EcoRI before IVT with  
267 HiScribe T7 High Yield RNA Synthesis kit (New England Biolabs). The sequence of the IVT DI,  
268 including the T7 promoter, hepatitis delta virus ribozyme, and the T7 terminator, is:

269 TAATACGACTCACTATAACCAGACAAGAGTTTAAGAGATATGTATCCTTTTAAAT  
270 TTTCTTGTCTTCTTGTAAGTTTTTCTTACTATTGTCATATGGATAAGTCCAAGAC  
271 TTCCAGGTACCGCGGAGCTTCGATCGTTCTGCACGATAGGGACTAATTATTACG  
272 AGCTGTCATATGGCTCGATATCACCCAGTGATCCATCATCAATCACGGTCGTGT  
273 ATTCATTTTGCCTGGCCCCGAACATCTTGACTGCCCTAAAATCTTCATCAAAA  
274 TCTTTATTTCTTTGGTGAGGAATCTATACGTTATACTATGTATAATATCCTCAAA  
275 CCTGTCTAATAAAGTTTTTGTGATAACCCTCAGGTTCCCTGATTTACGGGATGA  
276 TAATGAAACTATTCCCAATTGAAGTCTTGCTTCAAACCTTCTGGTCAGGGGAATGA  
277 CCCAGTTACCAATCTTGTGGACATAGATAAAGATAGTCTTGGACTTATCCATAT  
278 GACAATAGTAAGAAAACTTACAAGAAGACAAGAAAATTTAAAAGGATACATAT  
279 CTCTTAAACTCTTGTCTGGTGGCCGGCATGGTCCCAGCCTCCTCGCTGGCGCCGGC  
280 TGGGCAACATTCCGAGGGGACCGTCCCCTCGGTAATGGCGAATAGCATAACCCCTT  
281 GGGGCCTCTAAACGGGTCTTGAGGGGTTTTTTG.

282 The sequence of the SeV DI is highlighted in boldface.

283 Both, HCV PAMP and SeV DI RNA were purified by treatment with a 5X volume of homemade  
284 solid phase reversible immobilization (SPRI) beads (comparable to Beckman-Coulter AMPure  
285 beads) and elution in RNase-free water.

286

### 287 Synthetic gRNAs

288 Chemically synthesized gRNAs, which were purified using high-performance liquid  
289 chromatography (HPLC), were purchased from Synthego.

290

### 291 RNA quality control

292 IVT gRNAs were analyzed using a Bioanalyzer. This was performed by the UC Berkeley  
293 Functional Genomics Laboratory (FGL) core facility. gRNAs were denatured for 5 mins at 70C  
294 before analysis on bioanalyzer.

295

#### 296 Cas9 protein preparation

297 The Cas9 construct (pMJ915) contained an N-terminal hexahistidine-maltose binding protein  
298 (His6-MBP) tag, followed by a peptide sequence containing a tobacco etch virus (TEV) protease  
299 cleavage site. The protein was expressed in E. coli strain BL21 Rosetta 2 (DE3) (EMD  
300 Biosciences), grown in TB medium at 16°C for 16h following induction with 0.5 mM IPTG. The  
301 Cas9 protein was purified by a combination of affinity, ion exchange and size exclusion  
302 chromatographic steps. Briefly, cells were lysed in 20 mM HEPES pH 7.5, 1M KCl, 10mM  
303 imidazole, 1 mM TCEP, 10% glycerol (supplemented with protease inhibitor cocktail (Roche)) in  
304 a homogenizer (Avestin). Clarified lysate was bound to Ni-NTA agarose (Qiagen). The resin was  
305 washed extensively with lysis buffer and the bound protein was eluted in 20 mM HEPES pH 7.5,  
306 100mM KCl, 300mM imidazole, 1 mM TCEP 10% glycerol. The His6-MBP affinity tag was  
307 removed by cleavage with TEV protease, while the protein was dialyzed overnight against 20 mM  
308 HEPES pH 7.5, 300 mM KCl, 1 mM TCEP, 10% glycerol. The cleaved Cas9 protein was separated  
309 from the fusion tag by purification on a 5 ml SP Sepharose HiTrap column (GE Life Sciences),  
310 eluting with a linear gradient of 100 mM – 1 M KCl. The protein was further purified by size  
311 exclusion chromatography on a Superdex 200 16/60 column in 20 mM HEPES pH 7.5, 150 mM  
312 KCl and 1 mM TCEP. Eluted protein was concentrated to 40uM, flash-frozen in liquid nitrogen  
313 and stored at -80°C.

314

315 Culture and transfection of immortalized cell lines

316 Cells were obtained from ATCC and verified mycoplasma-free (Mycoalert LT-07, Lonza).  
317 HEK293, HEK293T, HCT116, HepG2 and HeLa cells were maintained in DMEM supplemented  
318 with 10 % FBS and 100 µg/mL Penicillin-Streptomycin (all Gibco). K562 and Jurkat cells were  
319 maintained in RPMI supplemented with 10% FBS and 100 µg/mL Penicillin-Streptomycin.  
320 All transfections in cell lines were performed in 12-well cell culture dishes using  $2 \times 10^5$  cells per  
321 transfection. For lipofection we used Lipofectamine™ CRISPRMAX™-Cas9, Lipofectamine®  
322 RNAiMAX or Lipofectamine® 2000 Transfection Reagent (all Invitrogen) in reverse-  
323 transfections according to the manufacturer's protocols. Unless stated otherwise,  $2 \times 10^5$  cells were  
324 transfected with 50 pmol of RNA and harvested 24-30h post transfection for RNA extraction.

325

326 Culture and transfection of primary HSPCs

327 Human CD34+ HSPCs from mobilized peripheral blood (Allcells, Inc) were thawed and cultured  
328 in StemSpan SFEM medium (StemCell Technologies) supplemented with StemSpan CC110  
329 cocktail (StemCell Technologies) for 48 hours before nucleofection with dCas9 RNP (50pmol of  
330 dCas9, 50 pmol of gRNA).  $1.5 \times 10^5$  HSPCs were pelleted (100 x g, 10 min) and resuspended in 20  
331 µl Lonza P3 solution, mixed with 10ul dCas9 RNP, and nucleofected using ER100 protocol in  
332 Lonza 4D nucleofector. Viability of the cells was measured 24 hours post nucleofection using  
333 Trypan blue exclusion test. RNA was harvested 16 hours post nucleofection.

334

335 RNA extraction, cDNA synthesis and qRT-PCR

336 Cell cultures were washed with PBS prior to RNA extraction. Total RNA was extracted using  
337 RNeasy Miniprep columns (Qiagen) according to the manufacturer's instructions including the



338 on-column DNaseI treatment (Qiagen). 1 µg of total RNA was used for subsequent cDNA  
339 synthesis using iScript™ Reverse Transcription Supermix (Biorad). For qRT-PCR reactions, a  
340 total of 20 ng of cDNA was used as a template and combined with primers (see Supplementary  
341 Table 3) and SsoFast™ EvaGreen® Supermix (Biorad) and amplicons were generated using  
342 standard PCR amplification protocols for 40 cycles on a StepOnePlus Real-Time PCR system  
343 (Applied Biosystems). Ct values for each target gene were normalized against Ct values obtained  
344 for *GAPDH* to account for differences in loading ( $\Delta$ Ct). To determine ‘fold activation’ of genes  
345  $\Delta$ Ct values for target genes were then normalized against  $\Delta$ Ct values for the same target gene for  
346 mock-treated cells ( $\Delta\Delta$ Ct).

347

#### 348 Generation of knockout cell lines

349 For CRISPR/Cas9 genome editing we used a plasmid encoding both the Cas9 protein and the  
350 gRNA. pSpCas9(BB)-2A-GFP (px458) was a gift from Feng Zhang (Addgene plasmid #48138).  
351 We designed gRNA sequences using the free CRISPR knockout design online tool from Synthego.  
352 Two different gRNA sequences were designed for RIG-I and MDA5, respectively (see  
353 Supplementary Table 3).

354  $2 \times 10^5$  HEK293 cells were nucleofected with 2 µg of px458 plasmids containing both targeting  
355 gRNAs in a 1:1 ratio using a Lonza 4D nucleofector (Lonza) with the manufacturer’s  
356 recommended settings. After 48h cells were harvested and subjected to fluorescence-activated cell  
357 sorting (FACS). Cells expressing high levels of GFP were single-cell sorted into 96-well plates to  
358 establish clonal populations.

359 For the screening process, genomic DNA from clonal populations was extracted using  
360 QuickExtract solution (Lucigen). For KO of RIG-I and MDA5 we screened clones by genomic

361 PCR looking for a PCR product that is significantly smaller in size than that of WT HEK293 cells  
362 (see Supplementary Table 4 for primers). PCR products were then Sanger sequenced by the UC  
363 Berkeley DNA Sequencing facility using the forward primers of the PCR reaction as sequencing  
364 primers.

365

### 366 Western Blot

367 Cells were harvested and washed with PBS. Cells were lysed in 1xRIPA buffer (EMD Millipore)  
368 for 10 mins on ice. Samples were spun down at 14000xg for 15 mins and protein lysates were  
369 transferred to a new tube. 50 µg of total protein was separated for size by SDS-PAGE and  
370 transferred to a nitrocellulose membrane. Blots were blocked in 4% skim milk in 50 mM Tris-  
371 HCl (pH 7.4), 150 mM NaCl, and 0.05% Tween 20 (TBST) and then probed for RIG-I,  
372 MDA5, MAVS or GAPDH protein using antibodies against RIG-I (D14G6), MDA5 (D74E4),  
373 MAVS (D5A9E) or GAPDH (14C10), respectively (all Cell Signaling Technologies). This was  
374 followed by incubation with secondary antibody IRDye® 800CW Donkey anti-Rabbit IgG (Li-  
375 Cor). Rainbow™ protein standards (GE Healthcare) were loaded in each gel for size estimation.  
376 Blots were visualized using a Li-Cor Odyssey Clx (Li-Cor).

377

### 378 **Acknowledgements**

379 We would like to thank Prof. Peter Palese from the Icahn School of Medicine at Mount Sinai, New  
380 York, for the Sendai virus DI IVT template DNA. The CRISPR/Cas9 genome-editing plasmid  
381 px458 was a gift from Feng Zhang, Broad Institute, Cambridge, MA (Addgene plasmid # 48138).

382

## 383 **References**

- 384 1. Ran FA, Hsu PD, Wright J, Agarwala V, Scott DA, Zhang F. Genome engineering using  
385 the CRISPR-Cas9 system. *Nat Protoc.* 2013 Nov;8(11):2281–308.
- 386 2. Zhang Z, Zhang Y, Gao F, Han S, Cheah KS, Tse H-F, et al. CRISPR/Cas9 Genome-  
387 Editing System in Human Stem Cells: Current Status and Future Prospects. *Mol Ther*  
388 *Nucleic Acids.* 2017 Dec 15;9:230–41.
- 389 3. Ceasar SA, Rajan V, Prykhozhiy SV, Berman JN, Ignacimuthu S. Insert, remove or replace:  
390 A highly advanced genome editing system using CRISPR/Cas9. *Biochim Biophys Acta.*  
391 2016 Jun 24;1863(9):2333–44.
- 392 4. Bortesi L, Fischer R. The CRISPR/Cas9 system for plant genome editing and beyond.  
393 *Biotechnol Adv.* 2015 Feb;33(1):41–52.
- 394 5. Ma H, Marti-Gutierrez N, Park S-W, Wu J, Lee Y, Suzuki K, et al. Correction of a  
395 pathogenic gene mutation in human embryos. *Nature.* 2017 Aug 24;548(7668):413–9.
- 396 6. Gabriel R, Lombardo A, Arens A, Miller JC, Genovese P, Kaeppl C, et al. An unbiased  
397 genome-wide analysis of zinc-finger nuclease specificity. *Nat Biotechnol.* 2011 Aug  
398 7;29(9):816–23.
- 399 7. Chen Y, Liu X, Zhang Y, Wang H, Ying H, Liu M, et al. A Self-restricted CRISPR System  
400 to Reduce Off-target Effects. *Mol Ther.* 2016;24(9):1508–10.
- 401 8. Kim S, Kim D, Cho SW, Kim J, Kim J-S. Highly efficient RNA-guided genome editing in  
402 human cells via delivery of purified Cas9 ribonucleoproteins. *Genome Res.* 2014  
403 Jun;24(6):1012–9.
- 404 9. Hultquist JF, Schumann K, Woo JM, Manganaro L, McGregor MJ, Doudna J, et al. A Cas9  
405 Ribonucleoprotein Platform for Functional Genetic Studies of HIV-Host Interactions in

- 406 Primary Human T Cells. *Cell Rep.* 2016 Oct 25;17(5):1438–52.
- 407 10. Schumann K, Lin S, Boyer E, Simeonov DR, Subramaniam M, Gate RE, et al. Generation  
408 of knock-in primary human T cells using Cas9 ribonucleoproteins. *Proc Natl Acad Sci*  
409 *USA.* 2015 Aug 18;112(33):10437–42.
- 410 11. DeWitt MA, Magis W, Bray NL, Wang T, Berman JR, Urbinati F, et al. Selection-free  
411 genome editing of the sickle mutation in human adult hematopoietic stem/progenitor cells.  
412 *Sci Transl Med.* 2016 Oct 12;8(360):360ra134.
- 413 12. Hendel A, Bak RO, Clark JT, Kennedy AB, Ryan DE, Roy S, et al. Chemically modified  
414 guide RNAs enhance CRISPR-Cas genome editing in human primary cells. *Nat*  
415 *Biotechnol.* 2015 Sep;33(9):985–9.
- 416 13. Gundry MC, Brunetti L, Lin A, Mayle AE, Kitano A, Wagner D, et al. Highly efficient  
417 genome editing of murine and human hematopoietic progenitor cells by crispr/cas9. *Cell*  
418 *Rep.* 2016 Oct 25;17(5):1453–61.
- 419 14. Dever DP, Bak RO, Reinisch A, Camarena J, Washington G, Nicolas CE, et al.  
420 CRISPR/Cas9  $\beta$ -globin gene targeting in human haematopoietic stem cells. *Nature.* 2016  
421 *Nov 17;539(7629):384–9.*
- 422 15. Staahl BT, Benekareddy M, Coulon-Bainier C, Banfal AA, Floor SN, Sabo JK, et al.  
423 Efficient genome editing in the mouse brain by local delivery of engineered Cas9  
424 ribonucleoprotein complexes. *Nat Biotechnol.* 2017 May;35(5):431–4.
- 425 16. Charlesworth CT, Deshpande PS, Dever DP, Dejene B, Gomez-Ospina N, Mantri S, et al.  
426 Identification of Pre-Existing Adaptive Immunity to Cas9 Proteins in Humans. *BioRxiv.*  
427 2018 Jan 5;
- 428 17. Akira S, Uematsu S, Takeuchi O. Pathogen recognition and innate immunity. *Cell.* 2006

- 429 Feb 24;124(4):783–801.
- 430 18. Kell AM, Gale M. RIG-I in RNA virus recognition. *Virology*. 2015 May;479–480:110–21.
- 431 19. Goubau D, Schlee M, Deddouche S, Pruijssers AJ, Zillinger T, Goldeck M, et al. Antiviral  
432 immunity via RIG-I-mediated recognition of RNA bearing 5'-diphosphates. *Nature*. 2014  
433 Oct 16;514(7522):372–5.
- 434 20. Saito T, Owen DM, Jiang F, Marcotrigiano J, Gale M. Innate immunity induced by  
435 composition-dependent RIG-I recognition of hepatitis C virus RNA. *Nature*. 2008 Jul  
436 24;454(7203):523–7.
- 437 21. Platanias LC. Mechanisms of type-I- and type-II-interferon-mediated signalling. *Nat Rev*  
438 *Immunol*. 2005 May;5(5):375–86.
- 439 22. Milligan JF, Groebe DR, Witherell GW, Uhlenbeck OC. Oligoribonucleotide synthesis  
440 using T7 RNA polymerase and synthetic DNA templates. *Nucleic Acids Res*. 1987 Nov  
441 11;15(21):8783–98.
- 442 23. Milligan JF, Uhlenbeck OC. [5] Synthesis of small RNAs using T7 RNA polymerase.  
443 RNA processing part A: general methods. Elsevier; 1989. p. 51–62.
- 444 24. Richardson CD, Ray GJ, DeWitt MA, Curie GL, Corn JE. Enhancing homology-directed  
445 genome editing by catalytically active and inactive CRISPR-Cas9 using asymmetric donor  
446 DNA. *Nat Biotechnol*. 2016 Mar;34(3):339–44.
- 447 25. Zuris JA, Thompson DB, Shu Y, Guilinger JP, Bessen JL, Hu JH, et al. Cationic lipid-  
448 mediated delivery of proteins enables efficient protein-based genome editing in vitro and in  
449 vivo. *Nat Biotechnol*. 2015 Jan;33(1):73–80.
- 450 26. Martínez-Gil L, Goff PH, Hai R, García-Sastre A, Shaw ML, Palese P. A Sendai virus-  
451 derived RNA agonist of RIG-I as a virus vaccine adjuvant. *J Virol*. 2013 Feb;87(3):1290–

- 452 300.
- 453 27. Horner SM, Gale M. Regulation of hepatic innate immunity by hepatitis C virus. *Nat Med.*  
454 2013 Jul;19(7):879–88.
- 455 28. Diaz MO, Zieminska S, Le Beau MM, Pitha P, Smith SD, Chilcote RR, et al. Homozygous  
456 deletion of the alpha- and beta 1-interferon genes in human leukemia and derived cell lines.  
457 *Proc Natl Acad Sci USA.* 1988 Jul;85(14):5259–63.
- 458 29. Runge S, Sparrer KMJ, Lässig C, Hembach K, Baum A, García-Sastre A, et al. In vivo  
459 ligands of MDA5 and RIG-I in measles virus-infected cells. *PLoS Pathog.* 2014 Apr  
460 17;10(4):e1004081.
- 461 30. Yoneyama M, Kikuchi M, Matsumoto K, Imaizumi T, Miyagishi M, Taira K, et al. Shared  
462 and unique functions of the DExD/H-box helicases RIG-I, MDA5, and LGP2 in antiviral  
463 innate immunity. *J Immunol.* 2005 Sep 1;175(5):2851–8.
- 464 31. Schmidt A, Schwerdt T, Hamm W, Hellmuth JC, Cui S, Wenzel M, et al. 5'-triphosphate  
465 RNA requires base-paired structures to activate antiviral signaling via RIG-I. *Proc Natl*  
466 *Acad Sci USA.* 2009 Jul 21;106(29):12067–72.
- 467 32. Hornung V, Ellegast J, Kim S, Brzózka K, Jung A, Kato H, et al. 5'-Triphosphate RNA is  
468 the ligand for RIG-I. *Science (80- ).* 2006 Nov 10;314(5801):994–7.
- 469 33. Chawla-Sarkar M, Lindner DJ, Liu YF, Williams BR, Sen GC, Silverman RH, et al.  
470 Apoptosis and interferons: role of interferon-stimulated genes as mediators of apoptosis.  
471 *Apoptosis.* 2003 Jun;8(3):237–49.
- 472 34. Onomoto K, Yoneyama M, Fung G, Kato H, Fujita T. Antiviral innate immunity and stress  
473 granule responses. *Trends Immunol.* 2014 Sep;35(9):420–8.
- 474 35. Yu Q, Katlinskaya YV, Carbone CJ, Zhao B, Katlinski KV, Zheng H, et al. DNA-damage-

- 475 induced type I interferon promotes senescence and inhibits stem cell function. *Cell Rep.*  
476 2015 May 5;11(5):785–97.
- 477 36. Pietras EM, Lakshminarasimhan R, Techner J-M, Fong S, Flach J, Binnewies M, et al. Re-  
478 entry into quiescence protects hematopoietic stem cells from the killing effect of chronic  
479 exposure to type I interferons. *J Exp Med.* 2014 Feb 10;211(2):245–62.
- 480 37. de Weerd NA, Samarajiwa SA, Hertzog PJ. Type I interferon receptors: biochemistry and  
481 biological functions. *J Biol Chem.* 2007 Jul 13;282(28):20053–7.
- 482 38. Kim S, Koo T, Jee H-G, Cho H-Y, Lee G, Lim D-G, et al. CRISPR RNAs trigger innate  
483 immune responses in human cells. *Genome Res.* 2018 Feb 22;
- 484 39. Lorenz R, Bernhart SH, Höner Zu Siederdisen C, Tafer H, Flamm C, Stadler PF, et al.  
485 ViennaRNA Package 2.0. *Algorithms Mol Biol.* 2011 Nov 24;6:26.
- 486
- 487

488

**Figure 1**

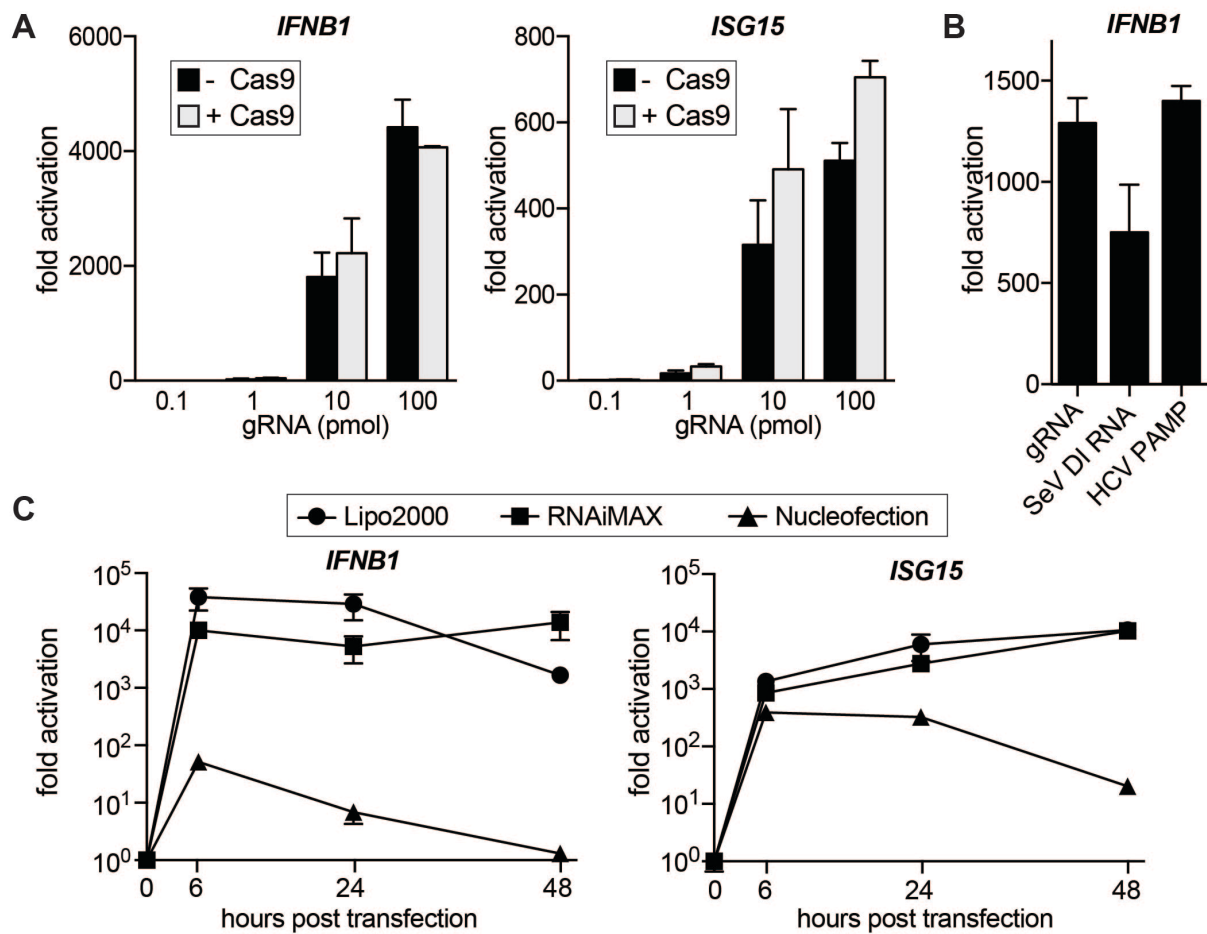

489

490 **Figure 1: Transfection of IVT gRNAs into HEK293 cells triggers a type I interferon response.**

491 (A) qRT-PCR analysis of *IFNB1* and *ISG15* transcript levels in HEK293 cells transfected with

492 increasing amounts of gRNA with and without Cas9 protein. In the samples with Cas9, gRNAs

493 were complexed with constant amounts (100 pmol) of Cas9 protein. Cells were harvested for RNA

494 extraction 30h after transfection using CRISPRMAX transfection reagent. Ct values were

495 normalized to Ct values of mock transfected HEK293 cells to determine fold activation. (B) qRT-

496 PCR analysis of *IFNB1* transcript levels in HEK293 cells transfected with equimolar amounts (50

497 pmol) of IVT gRNA, Sendai Virus defective interfering (SeV DI) RNA or HCV PAMP,



498 respectively. (C) qRT-PCR analysis of *IFNB1* and *ISG15* transcript levels in HEK293 cells over a  
 499 48h time course after transfection with 50 pmol via lipofection (Lipofectamine2000 or  
 500 RNAiMAX) or nucleofection, respectively. For all panels average values of three biological  
 501 replicates +/-SD are shown.  
 502

**Figure 2**

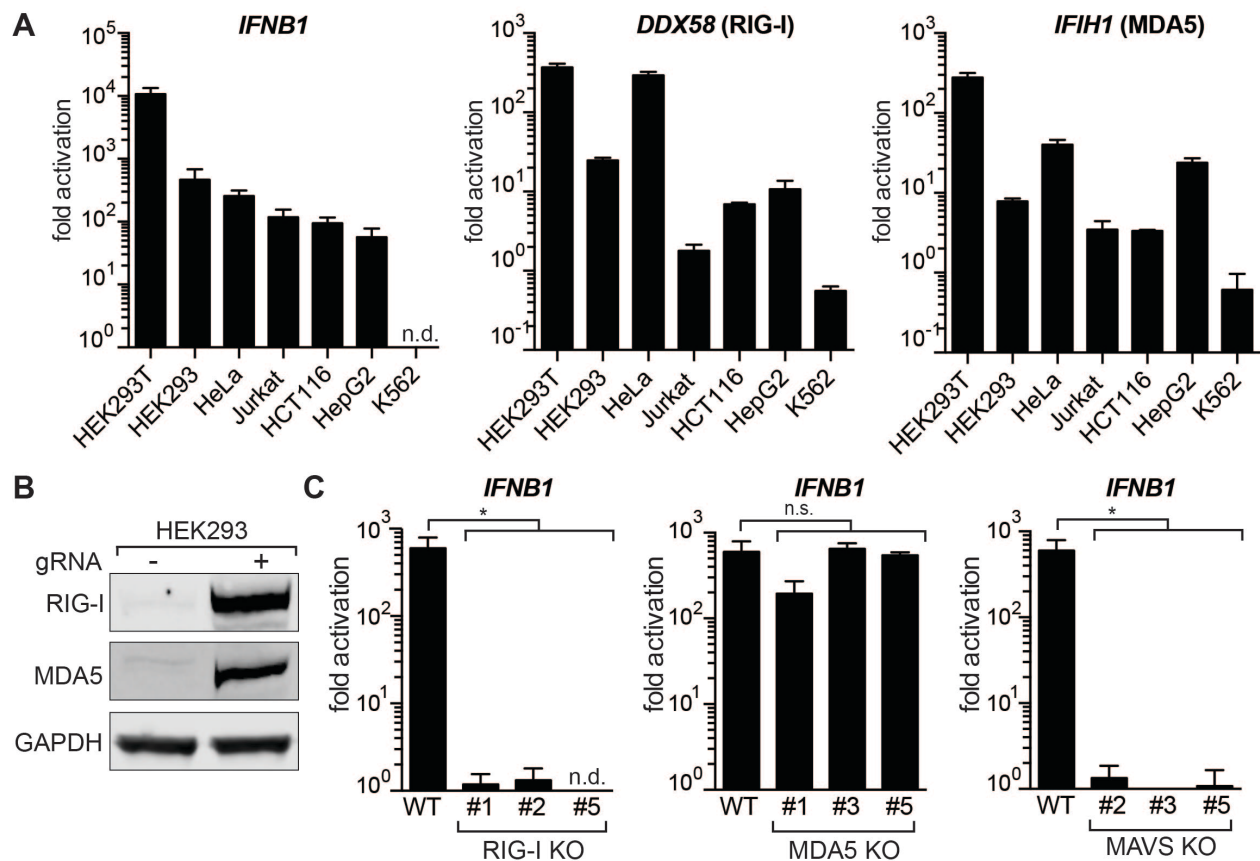

503  
 504 **Figure 2: IVT gRNAs are recognized via the RIG-I pathway.** (A) qRT-PCR analysis of increase  
 505 in *IFNB1* transcript levels (left) and transcript levels of the two main cytosolic RIG-I-like receptors  
 506 (*DDX58* and *IFIH1*) after introduction of IVT gRNA. Cell lines were ordered by responsiveness  
 507 to gRNA-mediated induction of *IFNB1* transcript levels. Cells were harvested for RNA extraction  
 508 30h after transfection. Ct values were normalized to Ct values of mock transfected cells for each

509 cell line to determine fold activation. *IFNB1* levels for K562 cells were too low to be determined  
 510 (n.d.). (B) Western Blot analysis for RIG-I and MDA5 expression of mock transfected and gRNA  
 511 transfected HEK293 cells after 48h. (C) qRT-PCR analysis of *IFNB1* transcript levels in HEK293  
 512 RIG-I (left), MDA5 (middle) and MAVS (right) knockout cells. Shown are three biological  
 513 replicates of three clonal populations of RIG-I, MDA5 or MAVS KO cells, respectively. *IFNB1*  
 514 levels for RIG-I KO clone #5 were too low to be determined (n.d.). For panels A and C, cells were  
 515 harvested for RNA extraction 30h after transfection using RNAiMAX transfection reagent.  
 516 Average values of three biological replicates +/-SD are shown. Statistical significances were  
 517 calculated by unpaired t-test (\*p<0.0001, n.s.: not significant).  
 518

**Figure 3**

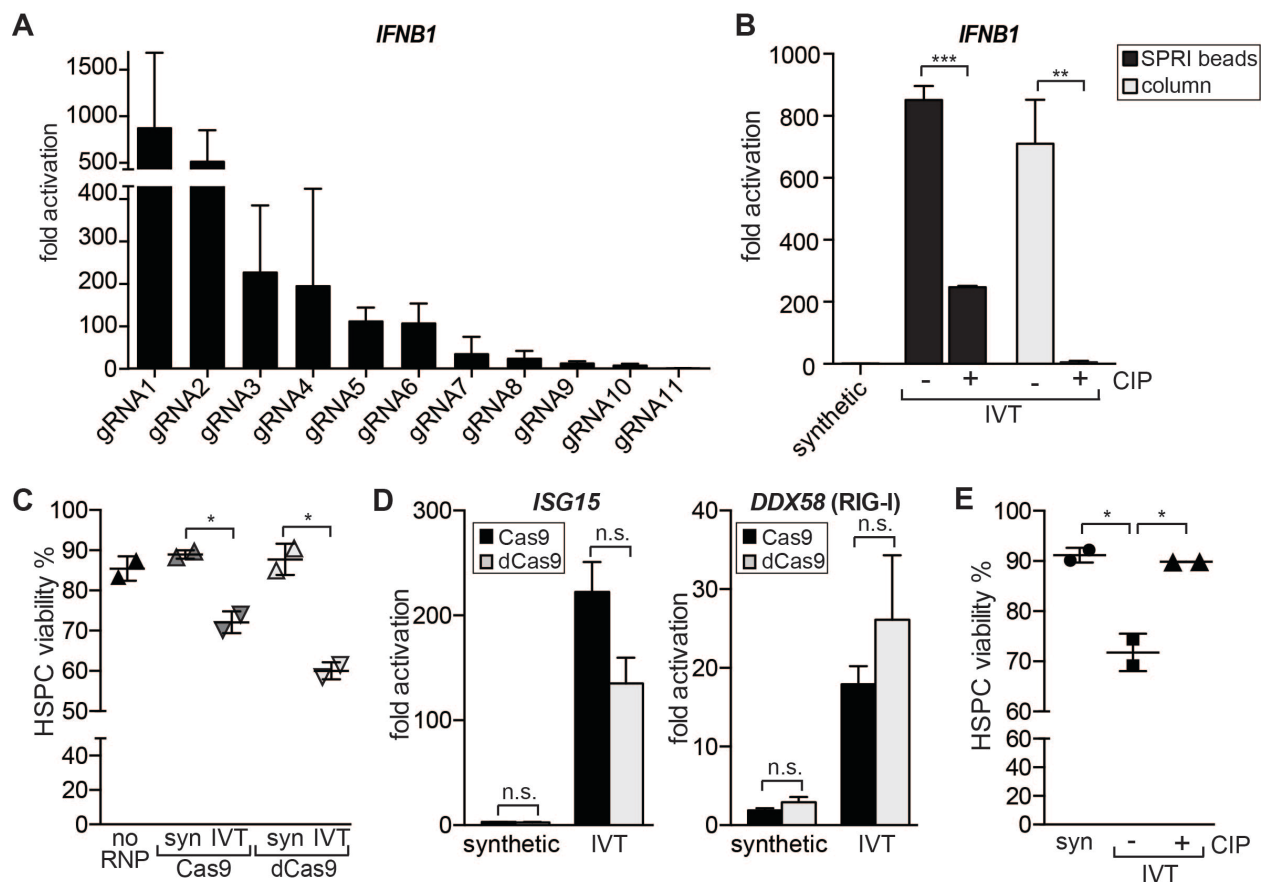

519

520 **Figure 3. Protospacer and 5'-triphosphate determine the intensity of the gRNA-mediated**

521 **IFN $\beta$  response.** (A) qRT-PCR analysis of *IFNBI* transcript levels in HEK293 cells transfected  
522 with equal amounts of gRNAs containing different 20 nucleotide protospacers. gRNAs were  
523 ordered by decreasing levels of *IFNBI* activation. gRNA1 refers to the gRNA that has been used  
524 in all previous experiments. (B) qRT-PCR analysis of *IFNBI* transcript levels in HEK293 cells  
525 transfected with synthetic, IVT and Calf intestine phosphatase treated (CIP) IVT gRNAs  
526 (gRNA1). After IVT and CIP treatment gRNAs were purified with SPRI beads or spin columns,  
527 respectively. Cells were harvested for RNA extraction 30h after transfection with RNAiMAX  
528 transfection reagent. Average values of three biological replicates +/-SD are shown. (C) Viability  
529 of human primary HSPCs 24h post nucleofection with no RNP and Cas9 or dCas9 RNPs. dCas9  
530 or Cas9 were complexed with synthetic (syn) or IVT gRNA targeting the *HBB* gene. Viability was  
531 determined by Trypan blue exclusion test. (D) qRT-PCR analysis of *ISG15* and *DDX58* (RIG-I)  
532 transcript levels in human primary HSPCs 16h post nucleofection. dCas9 or Cas9 were complexed  
533 with synthetic or IVT gRNA targeting the *HBB* gene, respectively. Ct values were normalized  
534 against Ct of mock-nucleofected cells. Average values of two biological replicates +/-SD are  
535 shown. (E) Viability of human primary HSPCs 16h post transfection with RNPs. RNPs consisted  
536 of dCas9 complexed with synthetic, IVT or CIP-treated IVT gRNAs targeting a non-coding intron  
537 of *JAK2*. Viability was determined by Trypan blue exclusion test. Statistical significances were  
538 calculated by unpaired t-test (\*p<0.05, \*\*p<0.01, \*\*\*p<0.0001, n.s.: not significant).  
539

540

Figure 4

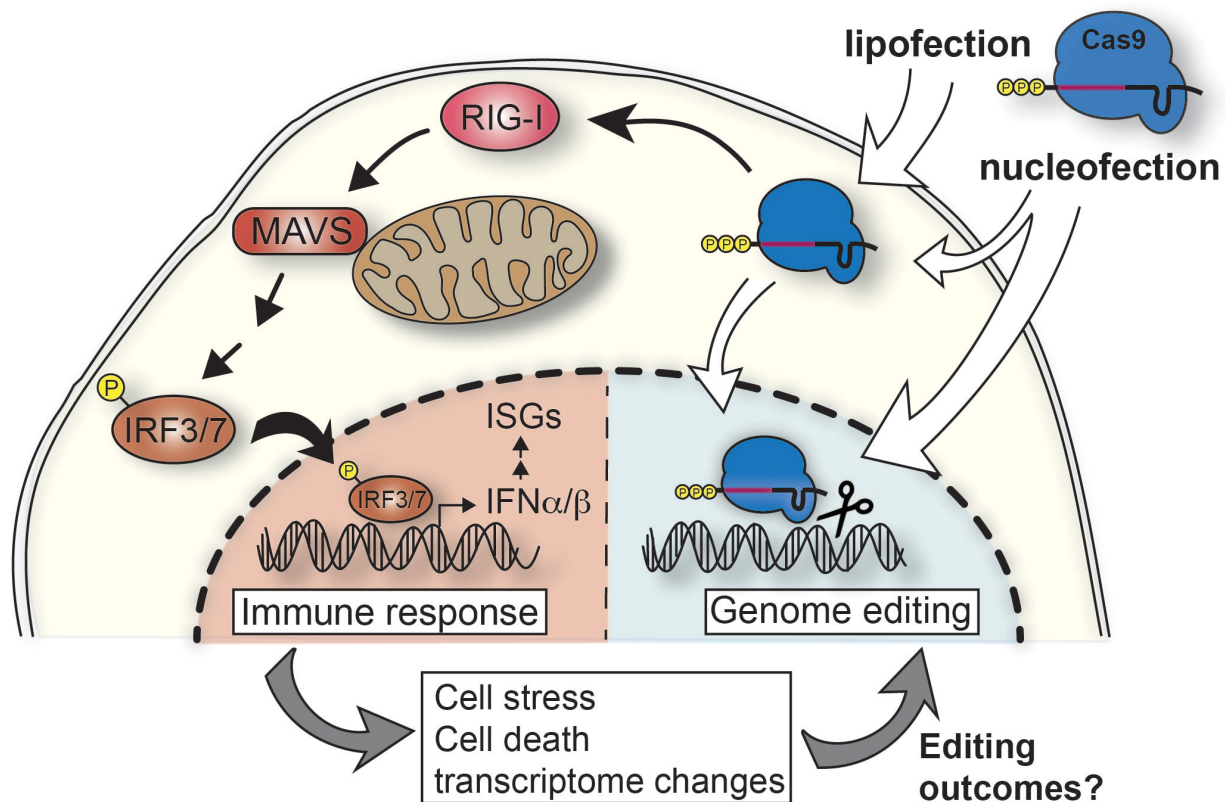

541

542 **Figure 4. Transfection of *in vitro* transcribed gRNAs induces a cytosolic immune response.**

543 Proposed model of IVT gRNA recognition pathways in mammalian cells. IVT gRNAs carry a 5'-  
544 triphosphate and when complexed with Cas9 protein and transfected into cells, cytosolic RNPs are  
545 recognized by RIG-I triggering a cascade of activation events through the mitochondrial antiviral  
546 signaling protein (MAVS). This results in phosphorylation of IRF3/7 and their shuttling into the  
547 nucleus to activate expression of type I interferons (IFN $\alpha/\beta$ ). This triggers the expression of  
548 interferon-stimulated genes (ISGs). This innate immune response changes the transcriptome of the  
549 cell and can cause cell stress and/or death which in turn might affect the editing outcomes.

550
